# Supplementary material for: Increased autocrine interleukin‐6 production is significantly associated with worse clinical outcome in patients with chronic lymphocytic leukemia
Source: PubMed Central journal article supplement — J Cell Physiol. 2019 Jan 8;234(8):13994–4006. doi: 10.1002/jcp.28086 (PMC6590298; doi:10.1002/jcp.28086), 2019-01-08
Supplement: JCP-234-13994-s001.pdf [file JCP-234-13994-s001.pdf]

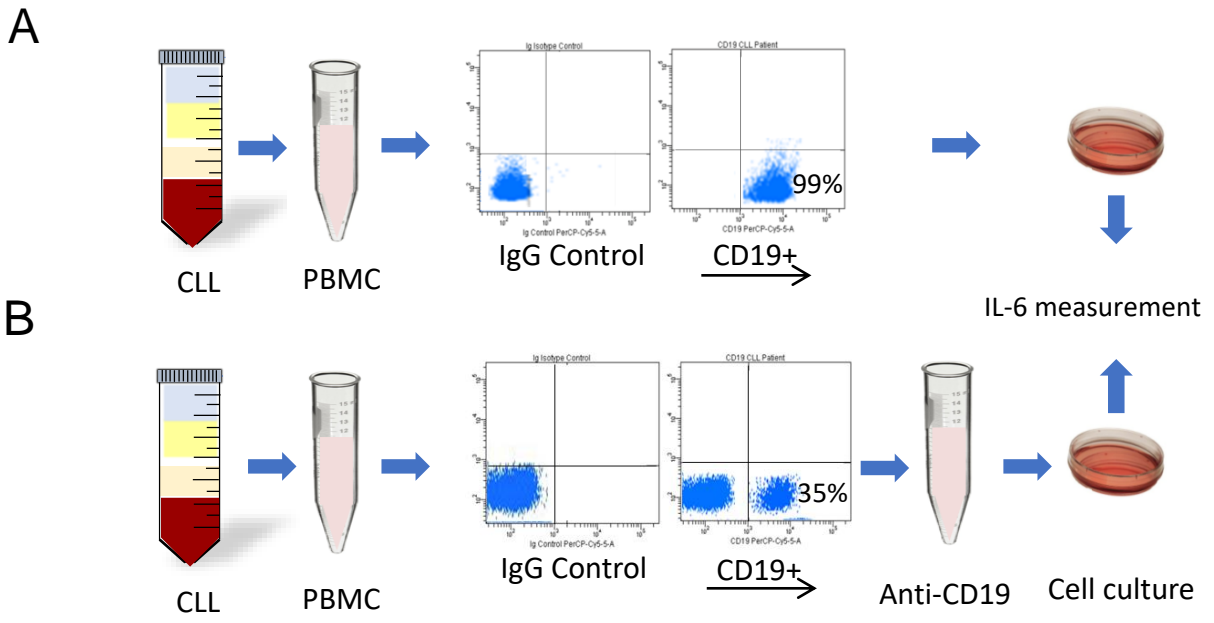

Suppl, Figure 1. Preparation of CLL B-cells for IL-6 ELISA assay. (A) high B-cell count CLL cells; (B) Low B-cell count CLL cells;

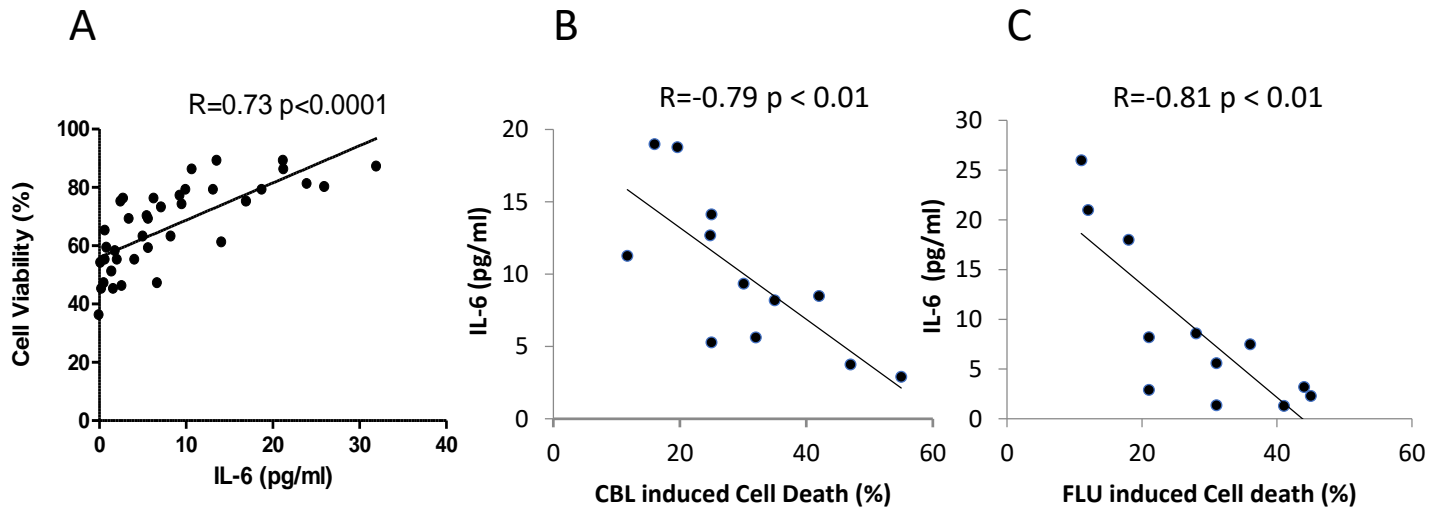

Suppl Figure 2. Correlation analysis between autocrine IL-6 with cell viability (A), sensitivity to CBL-induced cell death (B); and FLU-induced cell death (C).

**A**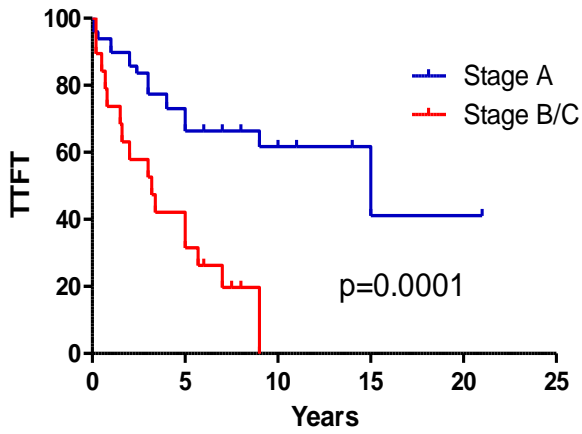**B**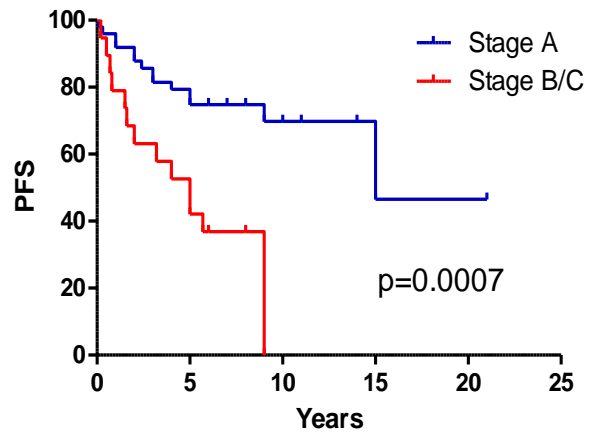**C**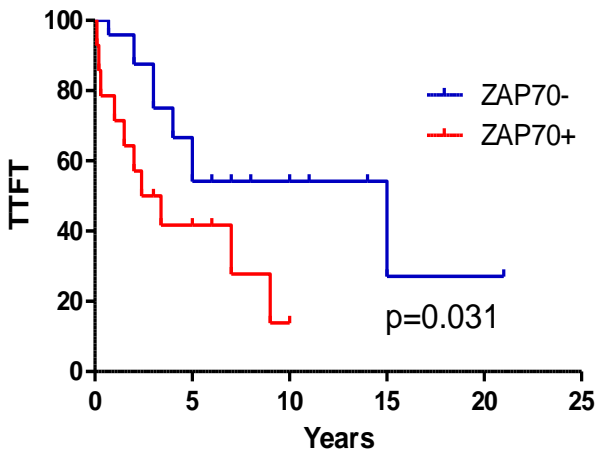**D**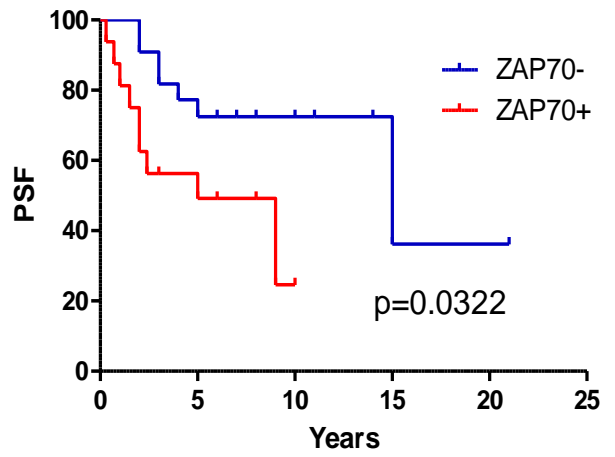**E**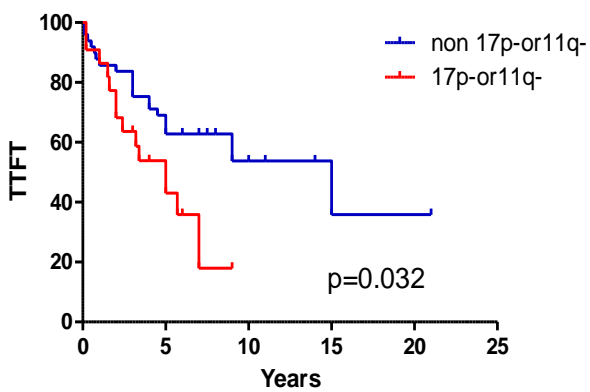**F**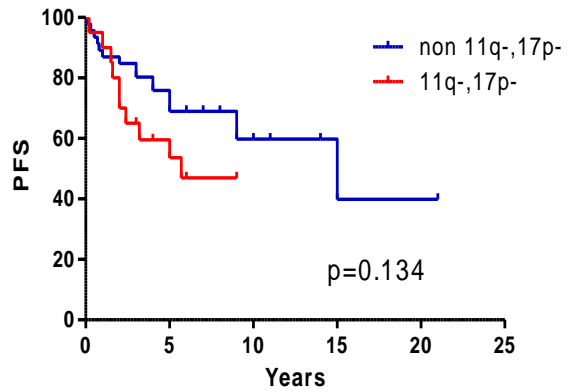

G

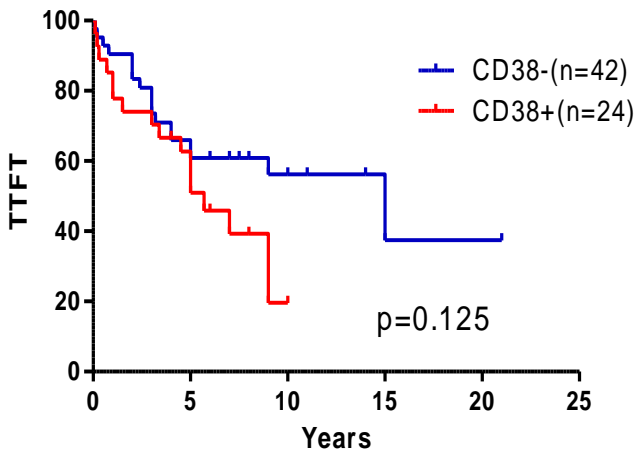

H

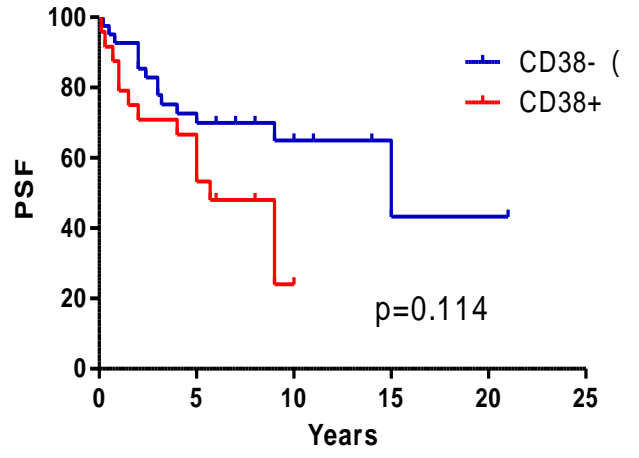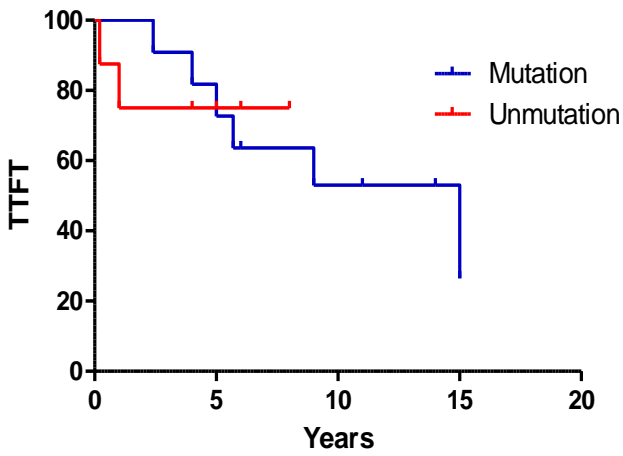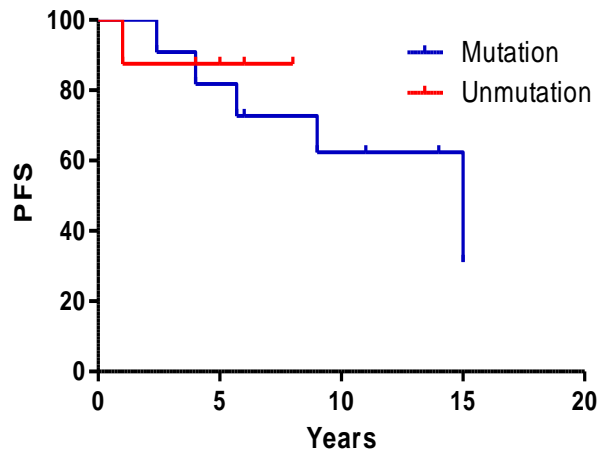

Suppl. Figure 3. Association of TTFT or PSF on each clinical risk factors.
